# Supplementary material
Source: PubMed Central journal article supplement (PMC3375907)
Supplement: NIHMS241422-supplement-1_si_001.pdf [file NIHMS241422-supplement-1_si_001.pdf]

**Outer-Sphere Effects on Reduction Potentials of Copper Sites in Proteins: The Curious Case of High Potential Type 2 C112D/M121E *Pseudomonas aeruginosa* Azurin**

Kyle M. Lancaster, Stephen Sproules, Joshua H. Palmer, John H. Richards, and Harry B. Gray

**Supporting Information**

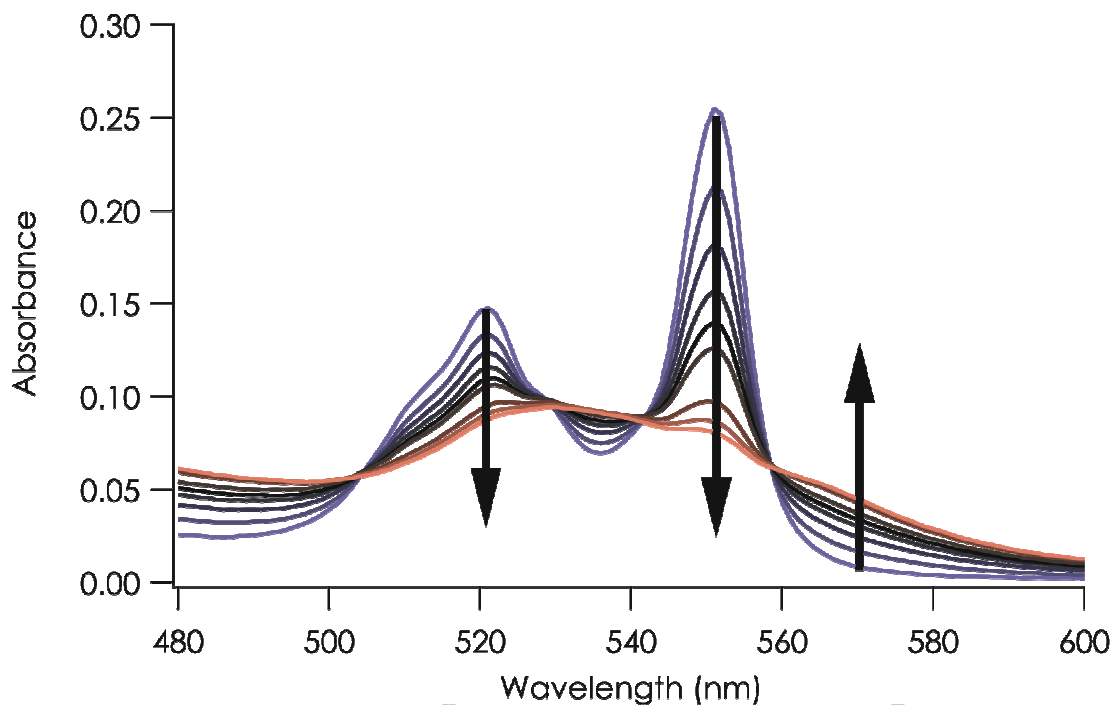

**Figure S1.** Titration of 8.5  $\mu\text{M}$   $\text{Fe}^{\text{II}}$  cytochrome  $c_{551}$  with 532  $\mu\text{M}$   $\text{Cu}^{\text{II}}$  C112D/M121E azurin in 50 mM HEPES, pH 7.0. Generally 3-5 minutes were required after addition and mixing to achieve equilibrium across the pH range in which the titrations were conducted. Titrations were carried out in triplicate at each reported pH.

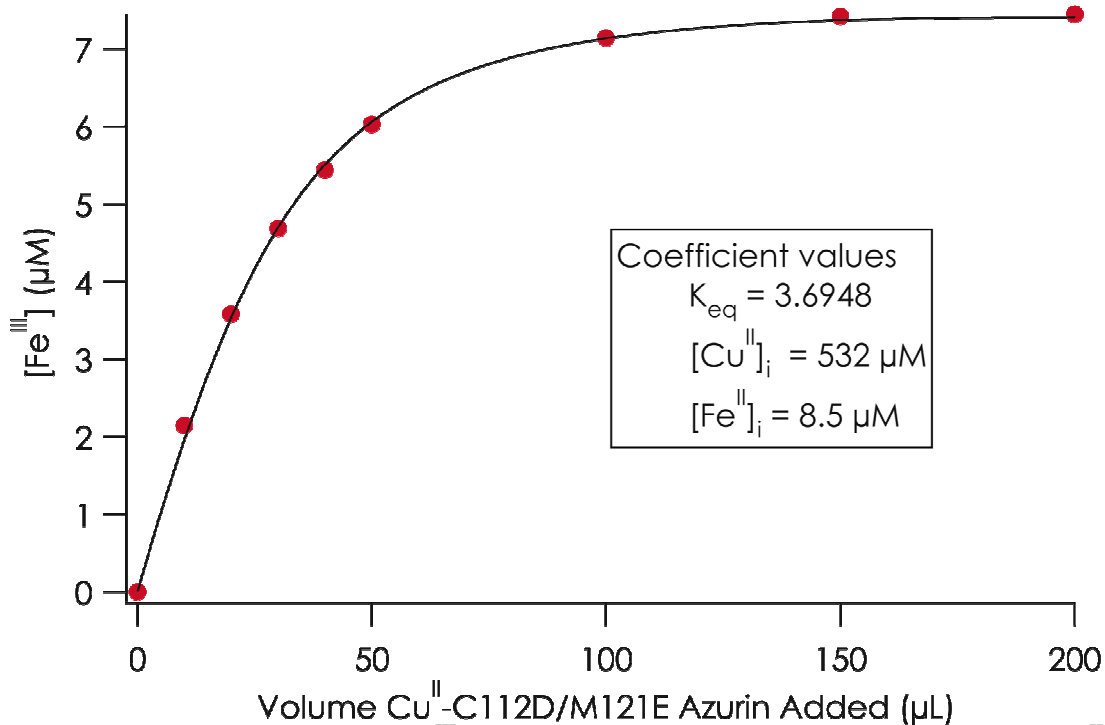

**Figure S2.** Plot of calculated  $[\text{Fe}^{\text{III}}]$  (Eq. 2, main body of text) against volume of  $\text{Cu}^{\text{II}}$  C112D/M121E azurin in 50 mM HEPES, pH 7.0. The data were fit to Eq. 1 (main body of text) to extract an equilibrium constant. This value was then inserted into the Nernst expression along with  $E^{\circ}_{1/2}$  for cytochrome  $c_{551}$  to calculate  $E^{\circ}_{1/2}$  for C112D/M121E azurin. Three such fits were averaged to yield the reported reduction potentials.

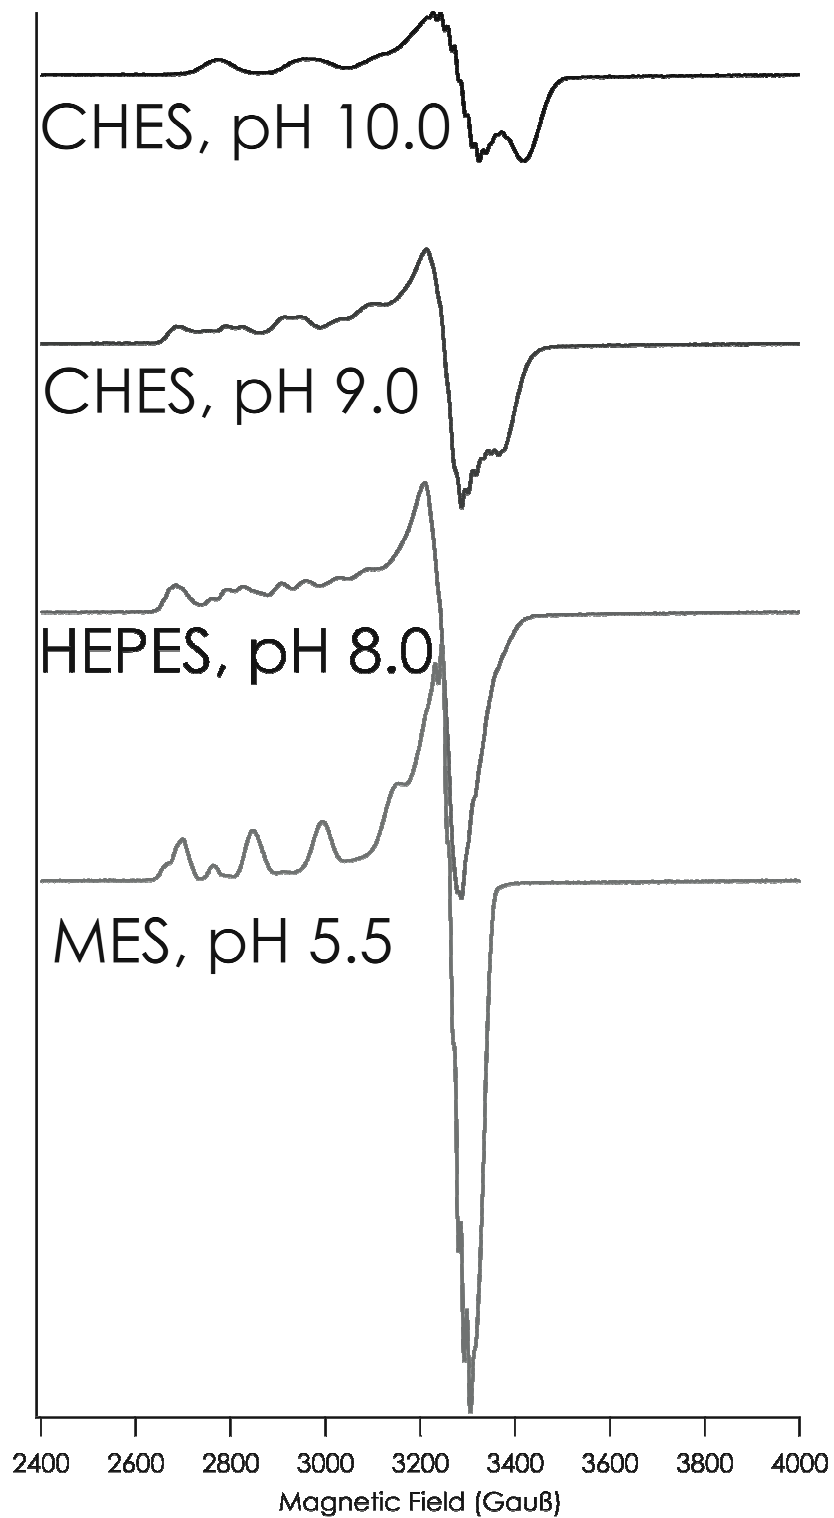

**Figure S3.** X-band EPRs of C112D/M121E azurin. in aqueous 77K glass containing 50 mM buffer.
