# Supplementary material
Source: PubMed Central journal article supplement (PMC3375907)
Supplement: NIHMS241422-supplement-4_si_004.pdf [file NIHMS241422-supplement-4_si_004.pdf]

# Outer-Sphere Effects on Reduction Potentials of Copper Sites in Proteins: The Curious Case of High Potential Type 2 C112D/M121E *Pseudomonas aeruginosa* Azurin

Kyle M. Lancaster, Stephen Sproules, Joshua H. Palmer, John H. Richards, and Harry B. Gray

## Supporting Information

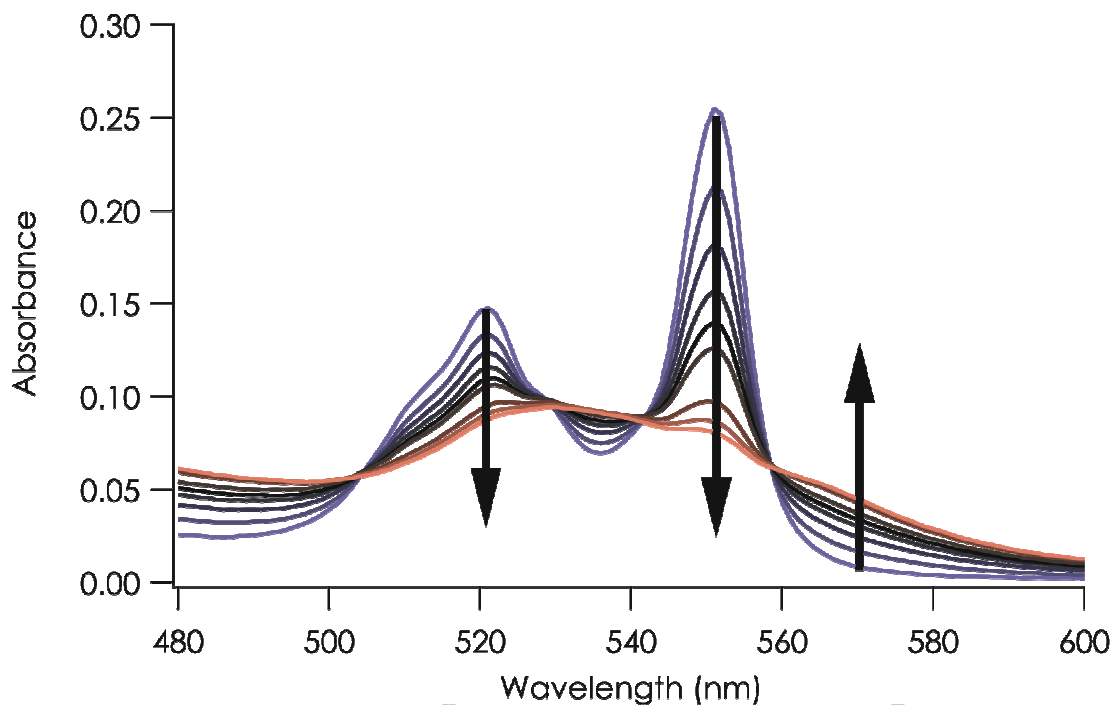

**Figure S1.** Titration of 8.5  $\mu\text{M}$   $\text{Fe}^{\text{II}}$  cytochrome  $c_{551}$  with 532  $\mu\text{M}$   $\text{Cu}^{\text{II}}$  C112D/M121E azurin in 50 mM HEPES, pH 7.0. Generally 3-5 minutes were required after addition and mixing to achieve equilibrium across the pH range in which the titrations were conducted. Titrations were carried out in triplicate at each reported pH.

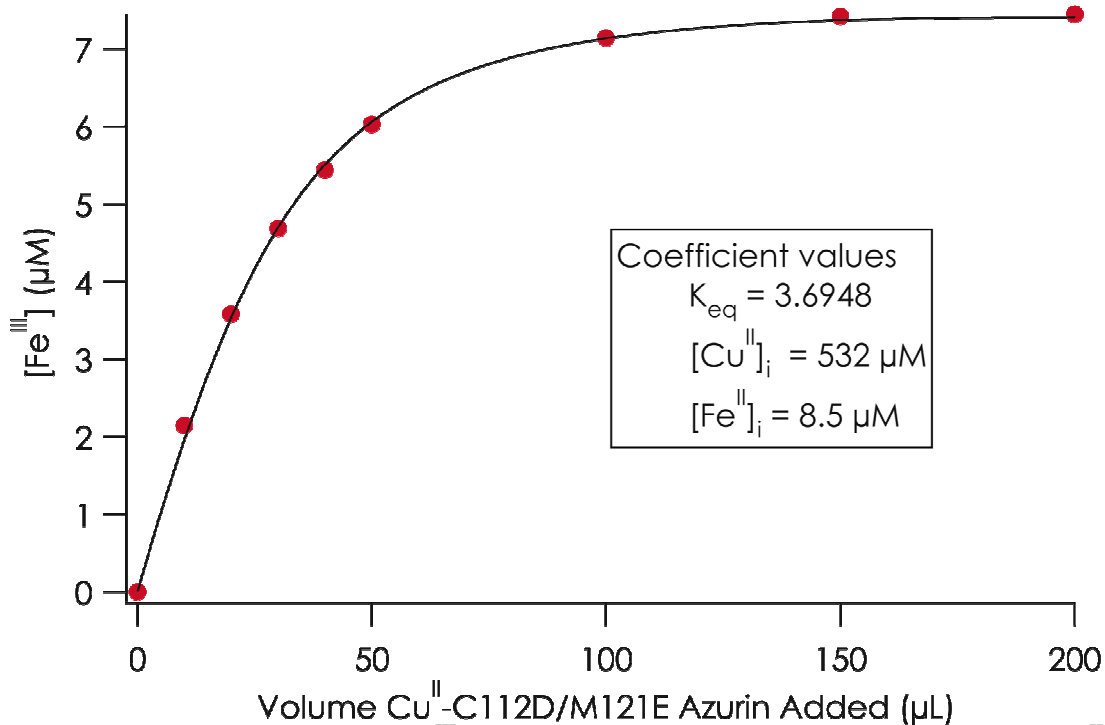

**Figure S2.** Plot of calculated  $[\text{Fe}^{\text{III}}]$  (Eq. 2, main body of text) against volume of  $\text{Cu}^{\text{II}}$  C112D/M121E azurin in 50 mM HEPES, pH 7.0. The data were fit to Eq. 1 (main body of text) to extract an equilibrium constant. This value was then inserted into the Nernst expression along with  $E^{\circ}_{1/2}$  for cytochrome  $c_{551}$  to calculate  $E^{\circ}_{1/2}$  for C112D/M121E azurin. Three such fits were averaged to yield the reported reduction potentials.

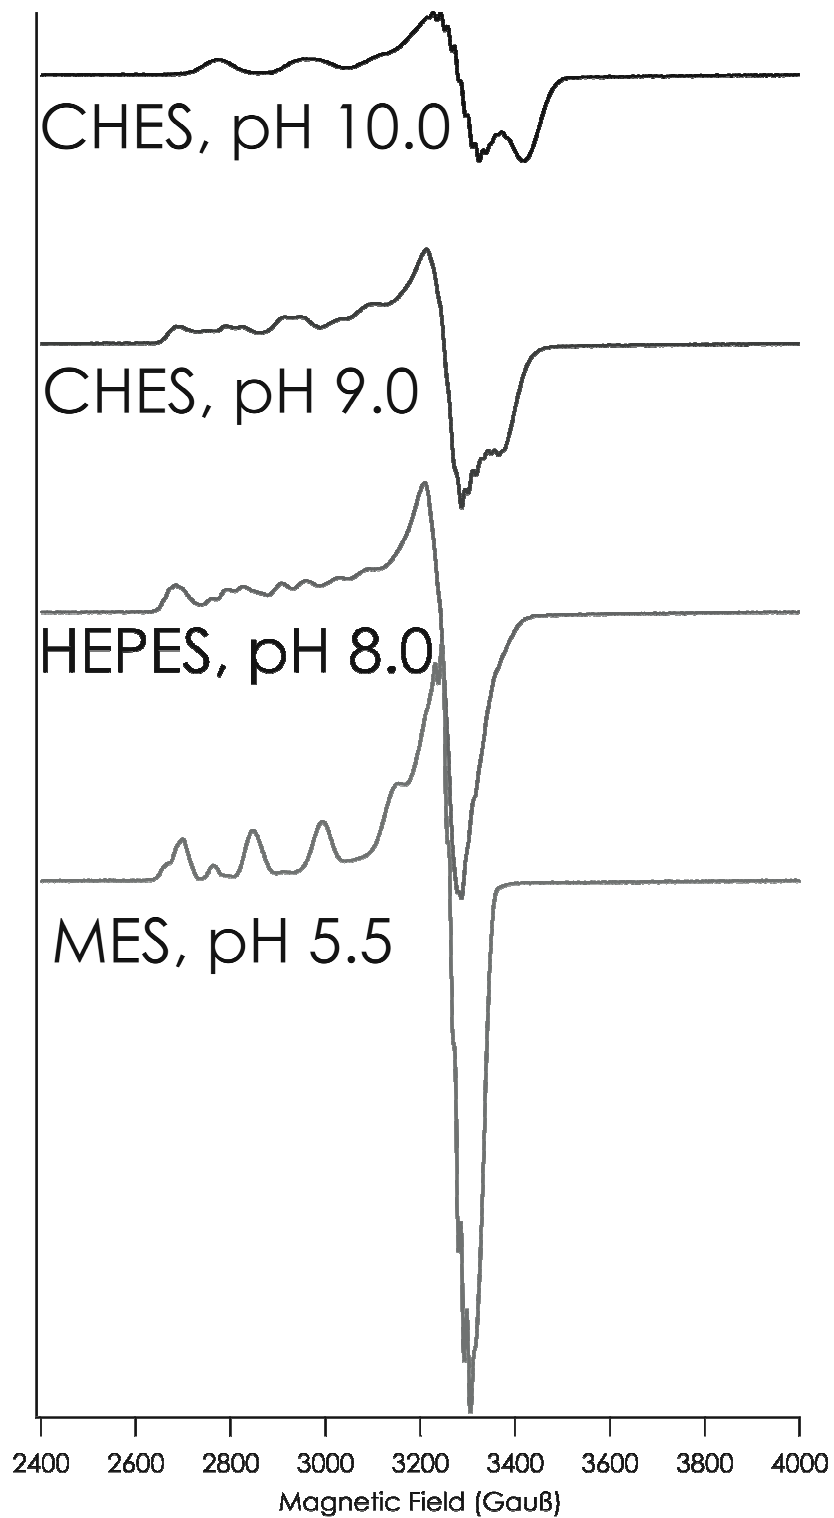

**Figure S3.** X-band EPRs of C112D/M121E azurin. in aqueous 77K glass containing 50 mM buffer.

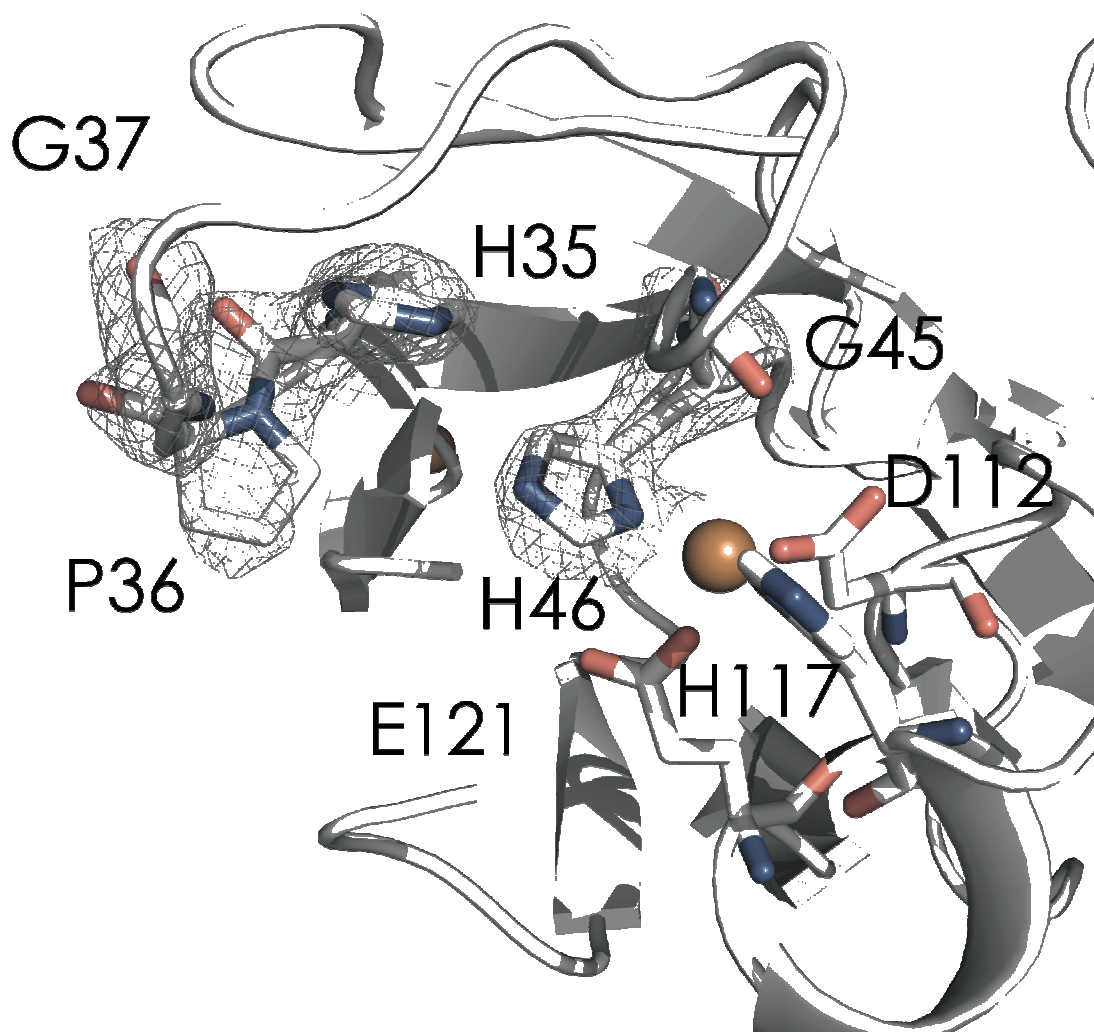

**Figure S4.** Active-site region showing the H35-P36 interaction in C112D/M121E azurin at pH 7.0 (2.4 Å, PDBID: 3OQR).  $2F_o - F_c$  maps are contoured at the  $1\sigma$  level. Nitrogen atoms are blue; oxygen atoms are red.

**Table S1.** Crystallographic data collection statistics for C112D/M121E azurin at pH 10.0.

|                            |                       |
|----------------------------|-----------------------|
| <b>Space Group</b>         | C 2 2 2 <sub>1</sub>  |
| <b>A</b>                   | 48.422                |
| <b>B</b>                   | 55.348                |
| <b>C</b>                   | 95.140                |
| <b><math>\alpha</math></b> | 90°                   |
| <b><math>\beta</math></b>  | 90°                   |
| <b><math>\gamma</math></b> | 90°                   |
| <b>Resolution</b>          | 7.99-2.40 Å           |
| <b>Reflections</b>         | 4374 (321)            |
|                            | 90.26%                |
| <b>Completeness</b>        | (94.12%)              |
| <b>Multiplicity</b>        | 2.7 (2.7)             |
| <b>I/sigmaI</b>            | 8.2 (4.4)             |
|                            | 19.6%                 |
| <b>Rwork</b>               | (33.3%)               |
|                            | 33.15%                |
| <b>Rfree</b>               | (38.5%)               |
| <b>e.s.u. (work)</b>       | 1.118 Å               |
| <b>e.s.u. (free)</b>       | 0.408 Å               |
| <b>B<sub>average</sub></b> | 52.248 Å <sup>2</sup> |

**Table S2.** Donor-atom distances to Cu<sup>II</sup> (Å) for C112D/M121E azurin at pH 10.0.

---

---

|                                            |      |
|--------------------------------------------|------|
| O(G45)                                     | 3.56 |
| N(H46)                                     | 1.86 |
| O <sub><math>\epsilon</math>1</sub> (D112) | 1.78 |
| O <sub><math>\epsilon</math>2</sub> (D112) | 3.77 |
| N(H117)                                    | 1.90 |
| O <sub><math>\epsilon</math>1</sub> (E121) | 2.17 |
| O <sub><math>\epsilon</math>2</sub> (E121) | 4.04 |
